# Supplementary material
Source: PubMed Central journal article supplement (PMC8570801)
Supplement: mmc1.pdf [file mmc1.pdf]

## Supplementary Materials

**Supplementary table 1. Cohort's characteristics.** Summary of demographic characteristics, number of study visits, co-morbidities and symptoms at disease onset. Long-term sub cohort is an integral part of the entire cohort. IQR = Interquartile range

|                                            | Entire cohort                                 | Long-term sub cohort                          |
|--------------------------------------------|-----------------------------------------------|-----------------------------------------------|
| Number of individuals                      | 278                                           | 53                                            |
| Age (years)                                | 12.0 – 91.2<br>(Median = 51.2,<br>IQR = 25.8) | 24.8 – 91.2<br>(Median = 55.8,<br>IQR = 13.9) |
| Female                                     | 59.5% (166/278)                               | 41% (22/53)                                   |
| Sample collection period                   | April 2020 - July<br>2020                     | April 2020 – May<br>2021                      |
| Weeks after positive PCR until first visit | 1 - 40 (Median = 6,<br>IQR = 4)               | 1 - 9 (Median = 6,<br>IQR = 3)                |
| <b>Number of study visits</b>              |                                               |                                               |
| Total sera count                           | 2016                                          | 738                                           |
| 1-5 Visits                                 | 68.4% (1378/2016)                             | 36.3% (268/738)                               |
| 6-10 Visits                                | 21.5% (434/2016)                              | 36.0% (266/738)                               |
| 11-15 Visits                               | 10.1% (204/2016)                              | 27.6% (204/738)                               |
| <b>Co-morbidities</b>                      |                                               |                                               |
| Hypertension                               | 18.8% (52/277)                                | 19% (10/53)                                   |
| Cancer                                     | 3.6% (10/276)                                 | 4% (2/53)                                     |
| Diabetes                                   | 4.0% (11/277)                                 | 6% (3/53)                                     |
| Pulmonary diseases                         | 9.7% (27/277)                                 | 15% (8/53)                                    |
| Immune system disorders                    | 3.2% (9/277)                                  | 0% (0/53)                                     |
| Coronary- / artery diseases                | 8.0% (22/276)                                 | 9% (5/53)                                     |
| <b>Symptoms at disease onset</b>           |                                               |                                               |
| None                                       | 5.4% (15/278)                                 | 4% (2/53)                                     |
| Cough                                      | 45.0% (125/278)                               | 47% (25/53)                                   |
| Cold                                       | 28.8% (80/278)                                | 19% (10/53)                                   |
| Sore throat                                | 26.6% (74/278)                                | 13% (7/53)                                    |
| Vomiting/nausea                            | 10.4% (29/278)                                | 9% (5/53)                                     |
| Diarrhea                                   | 14.4% (40/278)                                | 13% (7/53)                                    |
| Fatigue/malaise                            | 64.4% (179/278)                               | 70% (37/53)                                   |
| Myalgia/arthralgia                         | 40% (111/278)                                 | 40% (21/53)                                   |
| Headache                                   | 45.7% (127/278)                               | 36% (19/53)                                   |
| Hypo/dysgeusia and/or Hypo anosmia         | 33.8% (94/278)                                | 40% (21/53)                                   |
| Sensory disorders                          | 6.1% (17/278)                                 | 8% (4/53)                                     |
| Fever                                      | 40.0% (111/277)                               | 55% (29/53)                                   |

**Supplementary table 2. PCR test results over time.** Each individual was tested by nasopharyngeal swab (“swab”) and stool sample (“stool”) RT-PCR at each visit. Shown are all the visits grouped according to the time after positive PCR diagnosis: 2-6 weeks (n = 408, 21.3%), 7-11 weeks (n = 690, 36.0%), 12-16 weeks (n = 257, 13.4%), 17-21 weeks (n = 73, 3.8%), 22-26 weeks (n = 143, 7.5%), 27-31 weeks (n = 156, 8.1%), 32-37 weeks (n = 72, 3.8%) and 52-57 weeks (n = 119, 6.2%).

| Weeks after positive PCR | PCR Positive: Swab / Stool | PCR Negative: Swab / Stool | Total No. of Visits: Swab / Stool | % PCR Positive: Swab / Stool |
|--------------------------|----------------------------|----------------------------|-----------------------------------|------------------------------|
| 2 - 6                    | 11 / 14                    | 395 / 362                  | 406 / 376                         | 2.7 / 3.7                    |
| 7 - 11                   | 16 / 10                    | 669 / 636                  | 685 / 646                         | 2.3 / 1.6                    |
| 12 - 16                  | 4 / 0                      | 257 / 222                  | 261 / 222                         | 1.5 / 0                      |
| 17 - 21                  | 0 / 0                      | 74 / 50                    | 74 / 50                           | 0 / 0                        |
| 22 - 26                  | 1 / 0                      | 144 / 139                  | 145 / 139                         | 0.7 / 0                      |
| 27 - 31                  | 0 / 0                      | 156 / 149                  | 156 / 149                         | 0 / 0                        |
| 32 - 37                  | 0 / 0                      | 72 / 71                    | 72 / 71                           | 0 / 0                        |
| 52 - 57                  | 0 / 0                      | 154 / 8                    | 154 / 8                           | 0 / 0                        |
